# Supplementary material for: Selective deletion of Tsc1 from mouse cerebellar Purkinje neurons drives sex-specific behavioral impairments linked to autism
Source: Frontiers journal article supplement (doi:10.3389/fnbeh.2024.1474066), 2024-12-17
Supplement: Data_Sheet_1.pdf [file Data_Sheet_1.pdf]

**Supplemental Table 1: Results of statistical analyses for 9-11 week-old mice.**

Main effects of two-way ANOVA tests across sexes for each behavioral assay are reported as P-values. P<0.05 was considered to be statistically significant; significant effects are bolded. Dash indicates that a pairwise comparison was unable to be completed; RM, repeated measures.

| N                                | Test                                                                                      | Test Details                                                                                                       | Post hoc Multiple Comparisons                                                                        |
|----------------------------------|-------------------------------------------------------------------------------------------|--------------------------------------------------------------------------------------------------------------------|------------------------------------------------------------------------------------------------------|
| <b>Elevated Balance Beam</b>     |                                                                                           |                                                                                                                    |                                                                                                      |
| N=21<br>Males=11<br>Females = 10 | CN Males & Females<br>Time to Cross (10mm):<br>RM 2-way ANOVA                             | day x sex: F(3,57)=0.8883,<br>P=0.4528<br>sex: F(1,19)=0.3849, P=0.5424<br>day: F(2.592,49.24)=0.8088,<br>P=0.4794 | Šídák's, Male vs. Female<br>Day 1: P=0.5957<br>Day 2: P=0.9999<br>Day 3: P=0.9954<br>Day 4: P=0.8159 |
| N=20<br>Males=10<br>Females = 10 | <i>Tsc1</i> <sup>mut/wt</sup> Males & Females<br>Time to Cross (10mm):<br>RM 2-way ANOVA  | sex x day: F(3,54)=0.1186,<br>P=0.9488<br>sex: F(1,18)=1.784, P=0.1983<br>day: F(2.078,37.41)=1.630,<br>P=0.2089   | Šídák's, Male vs. Female<br>Day 1: P=0.8600<br>Day 2: P=0.9072<br>Day 3: P=0.5291<br>Day 4: P=0.7677 |
| N=24<br>Males=13<br>Females = 11 | <i>Tsc1</i> <sup>mut/mut</sup> Males & Females<br>Time to Cross (10mm):<br>RM 2-way ANOVA | sex x day: F(3,66)=1.882, P=0.1412<br>sex: F(1,22)=2.828, P=0.1068<br>day: F(2.175,47.86)=1.630,<br>P=0.2089       | Šídák's, Male vs. Female<br>Day 1: P=0.1941<br>Day 2: P=0.1873<br>Day 3: P=0.8345<br>Day 4: P=0.9753 |
| N=21<br>Males=11<br>Females = 10 | CN Males & Females<br>Time to Cross (8mm):<br>RM 2-way ANOVA                              | sex x day: F(3,57)=0.08166,<br>P=0.9697<br>sex: F(1,19)=4.365, P=0.0504<br>day: F(2.530,48.07)=0.1666,<br>P=0.8912 | Šídák's, Male vs. Female<br>Day 1: P=0.6696<br>Day 2: P=0.1831<br>Day 3: P=0.7248<br>Day 4: P=0.6880 |
| N=20<br>Males=10<br>Females = 10 | <i>Tsc1</i> <sup>mut/wt</sup> Males & Females<br>Time to Cross (8mm):<br>RM 2-way ANOVA   | sex x day: F(3,54)=0.028667,<br>P=0.9940<br>sex: F(1,18)=1.016, P=0.3269<br>day: F(2.805,50.49)=1.372,<br>P=0.2627 | Šídák's, Male vs. Female<br>Day 1: P=0.4348<br>Day 2: P=0.9786<br>Day 3: P=0.7831<br>Day 4: P=0.9490 |
| N=24<br>Males=13<br>Females = 11 | <i>Tsc1</i> <sup>mut/mut</sup> Males & Females<br>Time to Cross (8mm):<br>RM 2-way ANOVA  | sex x day: F(3,66)=1.073, P=0.3667<br>sex: F(1,22)=0.04588, P=0.8324<br>day: F(1.938,42.63)=1.330,<br>P=0.2747     | Šídák's, Male vs. Female<br>Day 1: P=0.9623<br>Day 2: P=0.9119<br>Day 3: P=0.9853<br>Day 4: P=0.9845 |
| N=21<br>Males=11<br>Females = 10 | CN Males & Females<br>Foot-slips (10mm):<br>RM 2-way ANOVA                                | sex x day: F(3,57)=2.184, P=0.0986<br>sex: F(1,19)=0.3501, P=0.5610<br>day: F(2.029,38.55)=0.9767,<br>P=0.3867     | Šídák's, Male vs. Female<br>Day 1: P=0.8113<br>Day 2: P>0.9999<br>Day 3: P=0.5205<br>Day 4: --       |

|                                  |                                                                                                 |                                                                                                                                   |                                                                                                         |
|----------------------------------|-------------------------------------------------------------------------------------------------|-----------------------------------------------------------------------------------------------------------------------------------|---------------------------------------------------------------------------------------------------------|
| N=20<br>Males=10<br>Females = 10 | <i>Tsc1</i> <sup>mut/wt</sup> Males & Females<br>Foot-slips (10mm):<br>RM 2-way ANOVA           | sex x day: F(3,54)=0.8319,<br>P=0.4822<br>sex: F(1,18)=1.528, P=0.2323<br>day: F(2,201,39.62)=0.8319,<br>P=0.4527                 | Šídák's, Male vs.<br>Female<br>Day 1: P>0.9999<br>Day 2: P=0.5205<br>Day 3: --<br>Day 4: P=0.8142       |
| N=24<br>Males=13<br>Females = 11 | <i>Tsc1</i> <sup>mut/mut</sup> Males & Females<br>Foot-slips (10mm):<br>RM 2-way ANOVA          | sex x day: F(3,66)=0.3565,<br>P=0.7846<br>sex: F(1,22)=0.1423, P=0.7056<br>day: F(2,591,57)=2.834, P=0.0536                       | Šídák's, Male vs.<br>Female<br>Day 1: P>0.9999<br>Day 2: P=0.9607<br>Day 3: P=0.9998<br>Day 4: P=0.9061 |
| N=21<br>Males=11<br>Females = 10 | CN Males & Females<br>Foot-slips (8mm):<br>RM 2-way ANOVA                                       | sex x day: F(3,57)=1.182, P=0.3248<br>sex: F(1,19)=0.3073, P=0.5858<br>day: F(2,557,48.59)=0.9318,<br>P=0.4204                    | Šídák's, Male vs.<br>Female<br>Day 1: P=0.5953<br>Day 2: P=0.7766<br>Day 3: P=0.9931<br>Day 4: P=0.6969 |
| N=20<br>Males=10<br>Females = 10 | <i>Tsc1</i> <sup>mut/wt</sup> Males & Females<br>Foot-slips (8mm):<br>RM 2-way ANOVA            | sex x day: F(3,54)=0.9649,<br>P=0.4160<br>sex: F(1,18)=1.477, P=0.2400<br>day: F(2,6,46.8)=1.076, P=0.3621                        | Šídák's, Male vs.<br>Female<br>Day 1: P=0.9981<br>Day 2: P=0.9960<br>Day 3: P=0.1967<br>Day 4: P=0.9090 |
| N=24<br>Males=13<br>Females = 11 | <i>Tsc1</i> <sup>mut/mut</sup> Males & Females<br>Foot-slips (8mm):<br>RM 2-way ANOVA           | sex x day: F(3,66)=1.160, P=0.3318<br>sex: F(1,22)=0.02369, P=0.8791<br>day: F(2,539,55.86)=5.157,<br><b>P=0.0051</b>             | Šídák's, Male vs.<br>Female<br>Day 1: P=0.9985<br>Day 2: P=0.8292<br>Day 3: P=0.9969<br>Day 4: P=0.8586 |
| <b>Social Interaction</b>        |                                                                                                 |                                                                                                                                   |                                                                                                         |
| N=21<br>Males=11<br>Females = 10 | CN Males & Females Direct<br>Contacts (Approach):<br>RM 2-way ANOVA                             | sex x preference: F(1,19)=0.08960,<br>P=0.7679<br>sex: F(1,19)=0.04783, P=0.8292<br>preference: F(1,19)=23.86,<br><b>P=0.0001</b> | Šídák's, Empty cup<br>vs. unfamiliar animal<br>Male: <b>P=0.0071</b><br>Female: <b>P=0.0040</b>         |
| N=20<br>Males=10<br>Females = 10 | <i>Tsc1</i> <sup>mut/wt</sup> Males & Females<br>Direct Contacts (Approach):<br>RM 2-way ANOVA  | sex x preference: F(1,18)=1.994,<br>P=0.1750<br>sex: F(1,18)=0.1828, P=0.6741<br>preference: F(1,18)=16.01,<br><b>P=0.0008</b>    | Šídák's, Empty cup<br>vs. unfamiliar animal<br>Male: P=0.1605<br>Female: <b>P=0.0025</b>                |
| N=24<br>Males=13<br>Females = 11 | <i>Tsc1</i> <sup>mut/mut</sup> Males & Females<br>Direct Contacts (Approach):<br>RM 2-way ANOVA | sex x preference: F(1,22)=1.639,<br>P=0.6895<br>sex: F(1,22)=1.694, P=0.2065<br>preference: F(1,22)=19.11,<br><b>P=0.002</b>      | Šídák's, Empty cup<br>vs. unfamiliar animal<br>Male: P=0.1627<br>Female: P=0.0845                       |

|                                                                                                                                                                 |                                                                                                                                                     |                                                                                                                                                |                                                                                                                                                                                                                         |
|-----------------------------------------------------------------------------------------------------------------------------------------------------------------|-----------------------------------------------------------------------------------------------------------------------------------------------------|------------------------------------------------------------------------------------------------------------------------------------------------|-------------------------------------------------------------------------------------------------------------------------------------------------------------------------------------------------------------------------|
| N=21<br>Males=11<br>Females = 10                                                                                                                                | CN Males & Females Direct<br>Contacts (Novelty):<br>RM 2-way ANOVA                                                                                  | sex x preference: F(1,19)=3.604,<br>P=0.0729<br>sex: F(1,19)=0.009826, P=0.9222<br>preference: F(1,19)=32.77,<br><b>P&lt;0.0001</b>            | Šídák's, Familiar<br>animal vs. unfamiliar<br>animal<br>Male: <b>P&lt;0.0001</b><br>Female: <b>P=0.0318</b>                                                                                                             |
| N=20<br>Males=10<br>Females = 10                                                                                                                                | <i>Tsc1</i> <sup>mut/wt</sup> Males & Females<br>Direct Contacts (Novelty):<br>RM 2-way ANOVA                                                       | sex x preference: F(1,18)=17.61,<br><b>P=0.0005</b><br>sex: F(1,18)=4.992, <b>P=0.0384</b><br>preference: F(1,18)=70.45,<br><b>P&lt;0.0001</b> | Šídák's, Familiar<br>animal vs. unfamiliar<br>animal<br>Male: <b>P&lt;0.0001</b><br>Female: <b>P=0.0164</b>                                                                                                             |
| N=24<br>Males=13<br>Females = 11                                                                                                                                | <i>Tsc1</i> <sup>mut/mut</sup> Males & Females<br>Direct Contacts (Novelty):<br>RM 2-way ANOVA                                                      | sex x preference: F(1,22)=0.6437,<br>P=0.4310<br>sex: F(1,22)=5.774, <b>P=0.0251</b><br>preference: F(1,22)=30.97,<br><b>P&lt;0.0001</b>       | Šídák's, Familiar<br>animal vs. unfamiliar<br>animal<br>Males: <b>P=0.0002</b><br>Females: <b>P=0.0076</b>                                                                                                              |
| N=65<br>CN=11 Males,<br>10 Females<br><i>Tsc1</i> <sup>mut/wt</sup> =<br>10 Males, 10<br>Females<br><i>Tsc1</i> <sup>mut/mut</sup> =<br>13 Males, 11<br>Females | CN, <i>Tsc1</i> <sup>mut/wt</sup> , & <i>Tsc1</i> <sup>mut/mut</sup> ,<br>Males & Females<br>Percentage of Investigation<br>(Approach): 2-way ANOVA | sex x genotype: F(2,59)=0.3772,<br>P=0.6874<br>genotype: F(2,59)=3.220,<br><b>P=0.0471</b><br>sex: F(1,59)=1.250, P=0.2681                     | Šídák's, Genotype<br>CN vs. <i>Tsc1</i> <sup>mut/wt</sup> :<br>P=0.6523<br>CN vs. <i>Tsc1</i> <sup>mut/mut</sup> :<br><b>P=0.0424</b><br><i>Tsc1</i> <sup>mut/wt</sup> vs.<br><i>Tsc1</i> <sup>mut/mut</sup> : P=0.4173 |
| N=65<br>CN=11 Males,<br>10 Females<br><i>Tsc1</i> <sup>mut/wt</sup> =<br>10 Males, 10<br>Females<br><i>Tsc1</i> <sup>mut/mut</sup> =<br>13 Males, 11<br>Females | CN, <i>Tsc1</i> <sup>mut/wt</sup> , & <i>Tsc1</i> <sup>mut/mut</sup> ,<br>Males & Females<br>Percentage of Investigation<br>(Novelty): 2-way ANOVA  | sex x genotype: F(2,59)=2.922,<br>P=0.0617<br>genotype: F(2,59)=1.239, P=0.2972<br>sex: F(1,59)=12.18, <b>P=0.0009</b>                         | Šídák's, Male vs.<br>Female<br>CN: <b>P=0.0055</b><br><i>Tsc1</i> <sup>mut/wt</sup> : <b>P=0.0434</b><br><i>Tsc1</i> <sup>mut/mut</sup> : P=0.9986                                                                      |
| <b>Repetitive Behavior</b>                                                                                                                                      |                                                                                                                                                     |                                                                                                                                                |                                                                                                                                                                                                                         |
| N=43<br>CN=6 Males,<br>8 Females<br><i>Tsc1</i> <sup>mut/wt</sup> = 6<br>Males, 5<br>Females<br><i>Tsc1</i> <sup>mut/mut</sup> =<br>9 Males, 9<br>Females       | CN, <i>Tsc1</i> <sup>mut/wt</sup> , & <i>Tsc1</i> <sup>mut/mut</sup> ,<br>Males & Females<br>Total Time Grooming:<br>2-way ANOVA                    | sex x genotype: F(2,37)=2.414,<br>P=0.1034<br>genotype: F(2,37)=0.2444,<br>P=0.7844<br>sex: F(1,37)=4.682, <b>P=0.0370</b>                     | Šídák's, Male vs.<br>Female<br>CN: P=0.0500<br><i>Tsc1</i> <sup>mut/wt</sup> : P=0.4180<br><i>Tsc1</i> <sup>mut/mut</sup> : P=0.9752                                                                                    |

**Supplemental Table 2: Results of statistical analyses for 16-24 week-old mice.**

Main effects of two-way ANOVA tests across sexes for each behavioral assay are reported as P-values.  $P < 0.05$  was considered to be statistically significant; significant effects are bolded. Dash indicates that a pairwise comparison was unable to be completed; RM, repeated measures.

| N                             | Test                                                                                   | Test Details                                                                                                                | <i>Post hoc</i> Multiple Comparisons                                                                         |
|-------------------------------|----------------------------------------------------------------------------------------|-----------------------------------------------------------------------------------------------------------------------------|--------------------------------------------------------------------------------------------------------------|
| Elevated Balance Beam         |                                                                                        |                                                                                                                             |                                                                                                              |
| N=18<br>Males=10<br>Females=8 | CN Males & Females Time to Cross (10mm):<br>RM 2-way ANOVA                             | sex x day: $F(3,48)=0.6286$ , $P=0.6001$<br>sex: $F(1,16)=1.279$ , $P=0.2930$<br>day: $F(2.703,43.25)=0.2806$ , $P=0.6036$  | Šídák's, Male vs. Female<br>Day 1: $P=0.7256$<br>Day 2: $P=0.9976$<br>Day 3: $P=0.9871$<br>Day 4: $P=0.9992$ |
| N=19<br>Males=9<br>Males=10   | <i>Tsc1</i> <sup>mut/mut</sup> Males & Females Time to Cross (10mm):<br>RM 2-way ANOVA | sex x day: $F(3,51)=0.7325$ , $P=0.5374$<br>sex: $F(1,17)=2.595$ , $P=0.12556$<br>day: $F(2.896,49.24)=1.746$ , $P=0.1714$  | Šídák's, Male vs. Female<br>Day 1: $P=0.3835$<br>Day 2: $P=0.9159$<br>Day 3: $P=0.4280$<br>Day 4: $P=0.6606$ |
| N=18<br>Males=10<br>Females=8 | CN Males & Females Time to Cross (8mm):<br>RM 2-way ANOVA                              | sex x day: $F(3,48)=0.77699$ , $P=0.5126$<br>sex: $F(1,16)=0.2006$ , $P=0.6602$<br>day: $F(2.719,43.5)=0.9122$ , $P=0.4350$ | Šídák's, Male vs. Female<br>Day 1: $P=0.9998$<br>Day 2: $P>0.9999$<br>Day 3: $P=0.6919$<br>Day 4: $P=0.9515$ |
| N=19<br>Males=9<br>Males=10   | <i>Tsc1</i> <sup>mut/mut</sup> Males & Females Time to Cross (8mm):<br>RM 2-way ANOVA  | sex x day: $F(3,51)=0.1847$ , $P=0.9063$<br>sex: $F(1,17)=1.010$ , $P=0.3290$<br>day: $F(2.012,34.21)=2.271$ , $P=0.1183$   | Šídák's, Male vs. Female<br>Day 1: $P=0.9525$<br>Day 2: $P=0.8574$<br>Day 3: $P=0.6724$<br>Day 4: $P=0.8931$ |
| N=18<br>Males=10<br>Females=8 | CN Males & Females Foot-slips (10mm):<br>RM 2-way ANOVA                                | sex x day: $F(3,48)=1.183$ , $P=0.3260$<br>sex: $F(1,16)=0.1616$ , $P=0.6930$<br>day: $F(2.395,38.31)=0.3188$ , $P=0.7668$  | Šídák's, Male vs. Female<br>Day 1: $P=0.8222$<br>Day 2: $P=0.8142$<br>Day 3: $P=0.8142$<br>Day 4: --         |
| N=19<br>Males=9<br>Males=10   | <i>Tsc1</i> <sup>mut/mut</sup> Males & Females Foot-slips (10mm):<br>RM 2-way ANOVA    | sex x day: $F(3,51)=1.904$ , $P=0.1406$<br>sex: $F(1,17)=0.04234$ , $P=0.8394$<br>day: $F(2.526,42.94)=1.1055$ , $P=0.3510$ | Šídák's, Male vs. Female<br>Day 1: $P=0.9978$<br>Day 2: $P=0.9772$<br>Day 3: $P=0.8486$<br>Day 4: $P=0.8643$ |
| N=18<br>Males=10<br>Females=8 | CN Males & Females Foot-slips (8mm):<br>RM 2-way ANOVA                                 | sex x day: $F(3,48)=0.8063$ , $P=0.4966$<br>sex: $F(1,16)=2.538$ , $P=0.1307$<br>day: $F(2.618,41.89)=1.936$ , $P=0.1454$   | Šídák's, Male vs. Female<br>Day 1: $P=0.5121$<br>Day 2: $P=0.9507$<br>Day 3: $P=0.9081$<br>Day 4: $P=0.9998$ |

|                                                                                              |                                                                                                                  |                                                                                                                                         |                                                                                                      |
|----------------------------------------------------------------------------------------------|------------------------------------------------------------------------------------------------------------------|-----------------------------------------------------------------------------------------------------------------------------------------|------------------------------------------------------------------------------------------------------|
| N=19<br>Males=9<br>Males=10                                                                  | <i>Tsc1</i> <sup>mut/mut</sup> Males & Females<br>Foot-slips (8mm):<br>RM 2-way ANOVA                            | sex x day: F(3,51)=0.9218, P=0.4370<br>sex: F(1,17)=0.08584, P=0.7731<br>day: F(2.193,37.29)=1.280,<br>P=0.2918                         | Šídák's, Male vs. Female<br>Day 1: P=0.9249<br>Day 2: P=0.9642<br>Day 3: P=0.9911<br>Day 4: P=0.9995 |
| Social Interaction                                                                           |                                                                                                                  |                                                                                                                                         |                                                                                                      |
| N=14<br>Males=8<br>Females=6                                                                 | CN Males & Females Direct<br>Contacts (Approach):<br>RM 2-way ANOVA                                              | sex x preference: F(1,12)=1.323,<br>P=0.2725<br>sex: F(1,12)=2.937, P=0.1123<br>preference: F(1,12)=35.16,<br><b>P&lt;0.0001</b>        | Šídák's, Empty cup vs.<br>unfamiliar animal<br>Male: <b>P=0.0003</b><br>Female: <b>P=0.0163</b>      |
| N=18<br>Males=9<br>Males=9                                                                   | <i>Tsc1</i> <sup>mut/mut</sup> Males & Females<br>Direct Contacts (Approach):<br>RM 2-way ANOVA                  | sex x preference: F(1,16)=8.096,<br><b>P=0.0117</b><br>sex: F(1,16)=1.729, P=0.2071<br>preference: F(1,16)=58.68,<br><b>P&lt;0.0001</b> | Šídák's, Empty cup vs.<br>unfamiliar animal<br>Male: P=0.5288<br>Female: <b>P=0.0025</b>             |
| N=14<br>Males=8<br>Females=6                                                                 | CN Males & Females Direct<br>Contacts (Novelty):<br>RM 2-way ANOVA                                               | sex x preference: F(1,12)=0.2264,<br>P=0.6427<br>sex: F(1,12)=3.252, P=0.0965<br>preference: F(1,12)=41.70,<br><b>P&lt;0.0001</b>       | Šídák's, Empty cup vs.<br>unfamiliar animal<br>Male: <b>P=0.0004</b><br>Female: <b>P=0.0038</b>      |
| N=18<br>Males=9<br>Males=10                                                                  | <i>Tsc1</i> <sup>mut/mut</sup> Males & Females<br>Direct Contacts (Novelty):<br>RM 2-way ANOVA                   | sex x preference: F(1,16)=8.096,<br><b>P=0.0117</b><br>sex: F(1,16)=1.729, P=0.2071<br>preference: F(1,16)=7.556,<br><b>P=0.0143</b>    | Šídák's, Empty cup vs.<br>unfamiliar animal<br>Male: P=0.1889<br>Female: P=0.0942                    |
| N=32<br>CN=8 Males, 6<br>Females<br><i>Tsc1</i> <sup>mut/mut</sup> =9<br>Males, 9<br>Females | CN & <i>Tsc1</i> <sup>mut/mut</sup><br>Males & Females<br>Percentage of Investigation<br>(Approach): 2-way ANOVA | sex x genotype: F(1,27)=5.713,<br><b>P=0.0241</b><br>genotype: F(1,27)=6.065, <b>P=0.0205</b><br>sex: F(1,27)=5.848, <b>P=0.0226</b>    | Šídák's, Male vs. Female<br>CN: P=0.9998<br><i>Tsc1</i> <sup>mut/mut</sup> : <b>P=0.0026</b>         |
| N=32<br>CN=8 Males, 6<br>Females<br><i>Tsc1</i> <sup>mut/mut</sup> =9<br>Males, 9<br>Females | CN & <i>Tsc1</i> <sup>mut/mut</sup><br>Males & Females<br>Percentage of Investigation<br>(Novelty): 2-way ANOVA  | sex x genotype: F(1,27)=0.4497,<br>P=0.5082<br>genotype: F(1,27)=12.92, <b>P=0.0013</b><br>sex: F(1,27)=4.472, <b>P=0.0438</b>          | Šídák's, Male vs. Female<br>CN: P=0.5644<br><i>Tsc1</i> <sup>mut/mut</sup> : P=0.0917                |

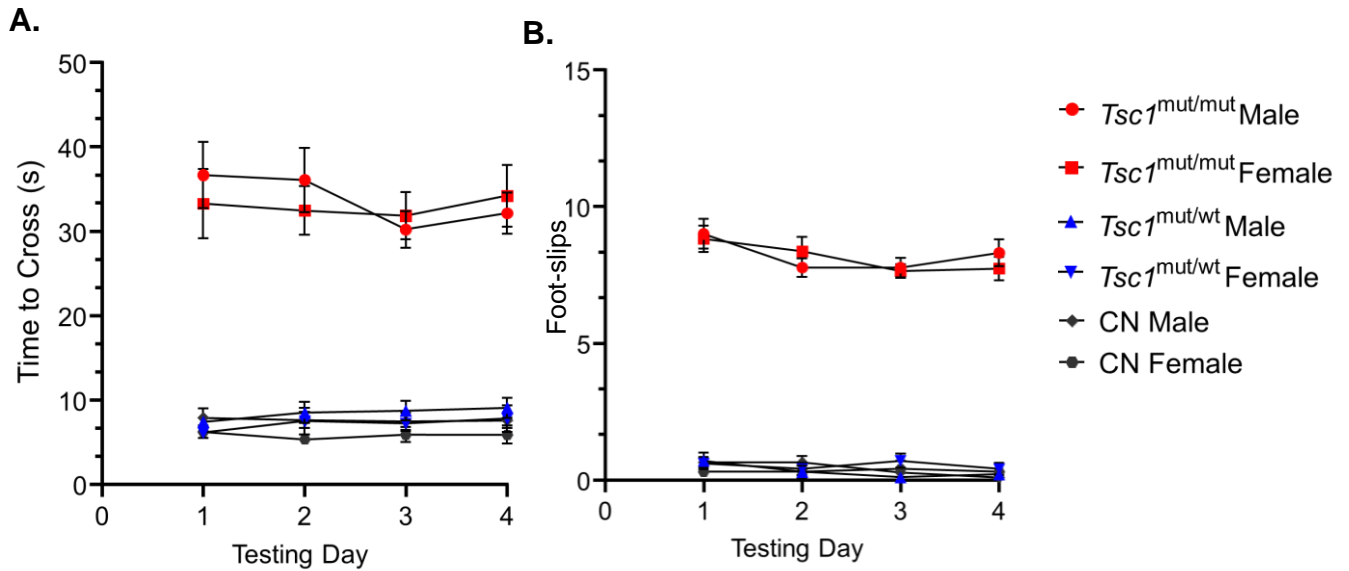

### Supplemental Figure 1:

Motor coordination and balance testing of male and female 9–11 week-old *Tsc1*<sup>mut/mut</sup> (N=13 males and N=11 females), *Tsc1*<sup>mut/wt</sup> (N=10 males and N=10 females), and control (CN, N=11 males and N=10 females) mice were tested on an elevated balance beam 8mm in width. *Tsc1*<sup>mut/mut</sup> mice performed significantly ( $p < 0.0001$ ) worse than control animals on across all four testing days, but no difference in the time to cross (panel **A**) or number of hindlimb foot-slips (panel **B**) between sexes within each of the genotypes. Mean  $\pm$  SEM values are plotted.

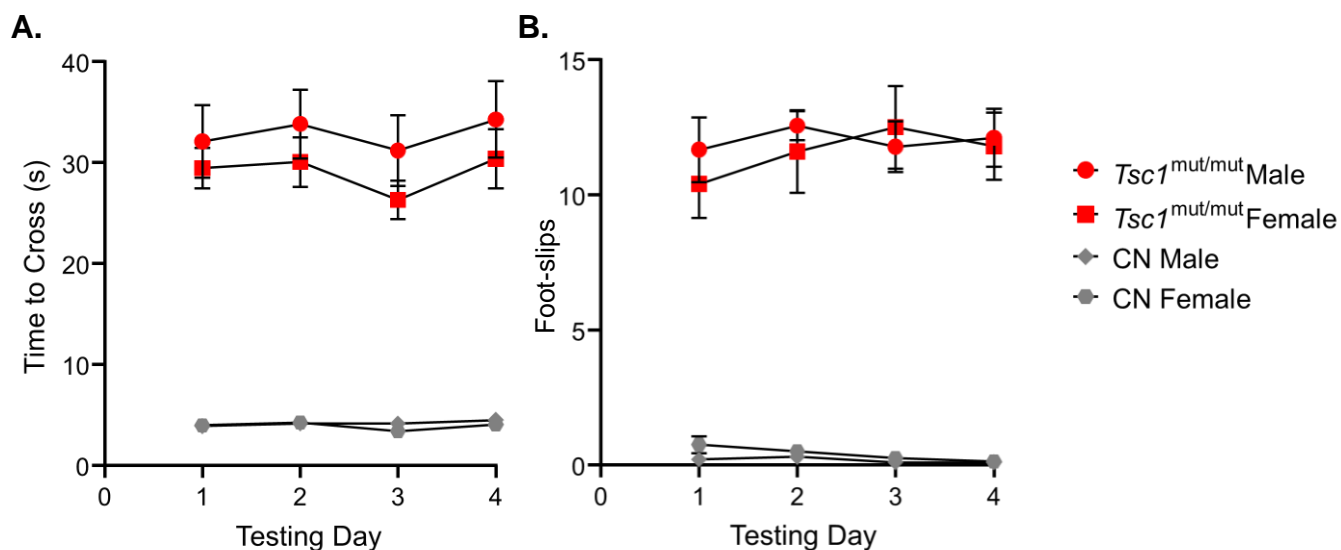

**Supplemental Figure 2.**

16-24 week-old *Tsc1*<sup>mut/mut</sup> (N=9 males and N=10 females) and control (N=10 males and N=8 females) mice of both sexes were tested on an elevated balance beam 8mm in width. *Tsc1*<sup>mut/mut</sup> mice performed significantly ( $p < 0.0001$ ) worse than control animals on across all four testing days, and no difference in the time to cross (panel **A**) or number of hindlimb foot-slips (panel **B**) between sexes was measured for either genotype. Mean  $\pm$  SEM values are plotted.

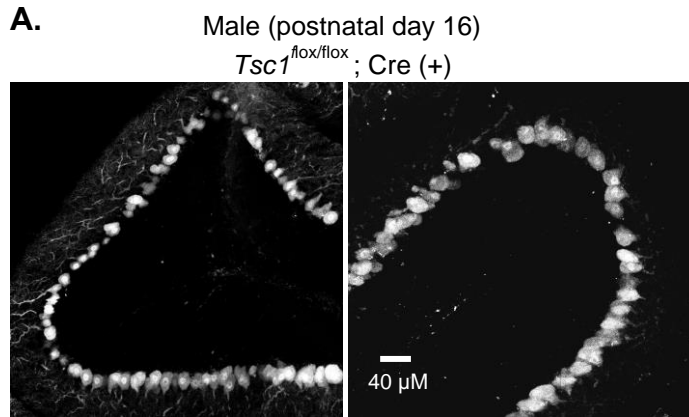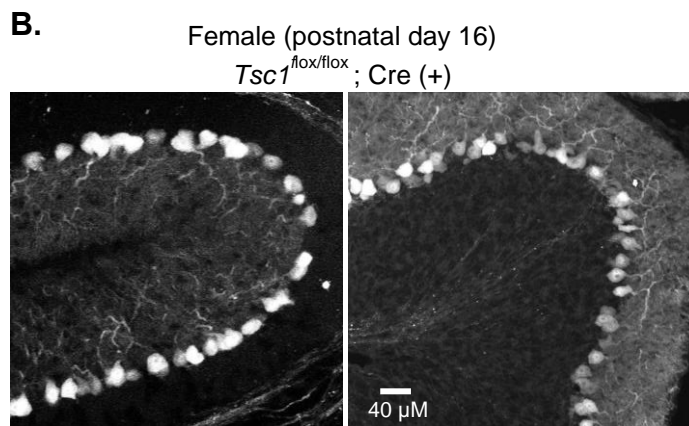

**Supplemental Figure 3.**

Using the Ai14 tdTomato Cre-reporter line (see Methods) tdTomato immunofluorescence was similarly expressed in the Purkinje neuron layer of parasagittal cerebellar sections taken from P16 male (panel **A.**) and P16 female (panel **B.**) *Tsc1<sup>flox/flox</sup>*; Cre (+) animals.



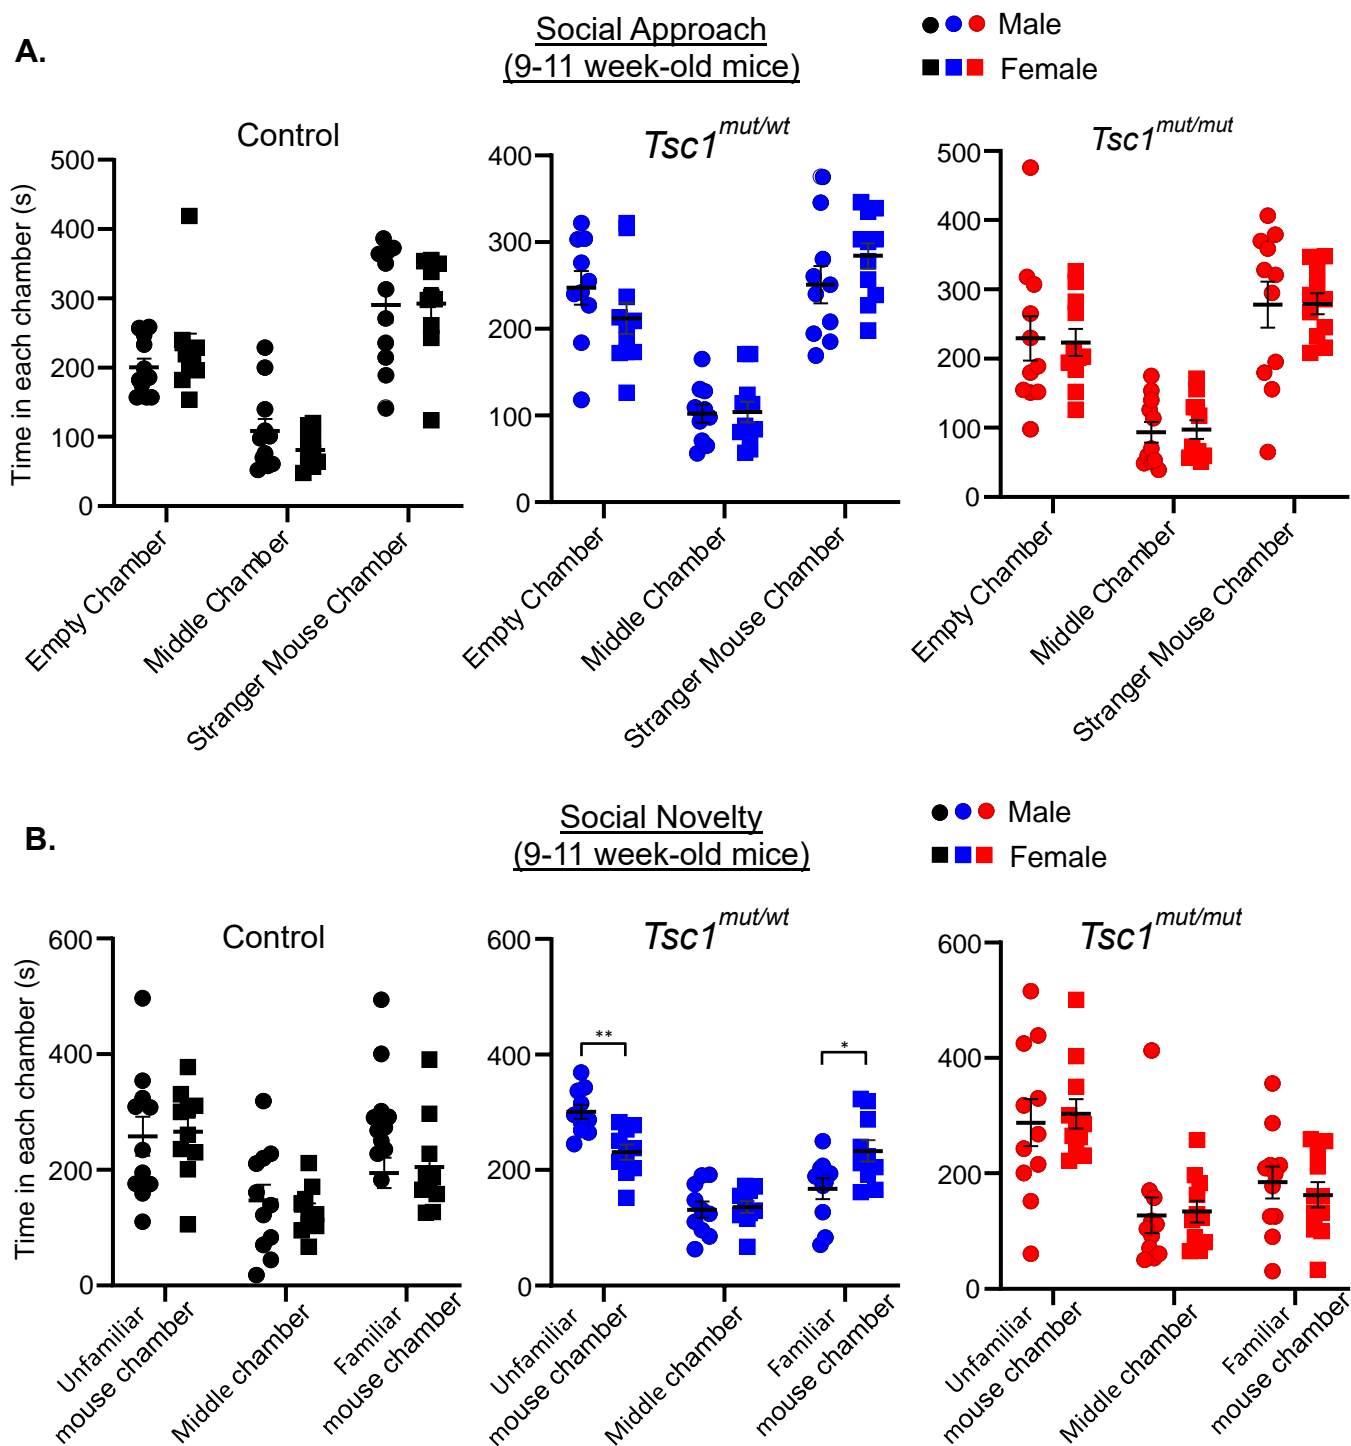

### Supplemental Figure 4.

9-11 week-old control (*black*, left), *Tsc1<sup>mut/wt</sup>* (*blue*, center), and *Tsc1<sup>mut/mut</sup>* (*red*, right) mice of both sexes performed the 3-chamber social approach (**A.**) and social novelty (**B.**) assays for 10 minutes (presented in Figures 4 and 6). The time male and female mice spent in each chamber are plotted for each type of assay and across the three genotypes. Mean  $\pm$  SEM values are plotted as black bars. Within each genotype for the social approach assay, there were no significant differences across male and female animals for the time spent in each chamber (Student's unpaired t-test). In the Social Novelty assay (panel **B.**), male *Tsc1<sup>mut/wt</sup>* animals spent significantly ( $P < .01$ ) more time in the unfamiliar mouse chamber, and significantly ( $P < .05$ ) less time in the familiar mouse chamber, when compared to female *Tsc1<sup>mut/wt</sup>* mice (unpaired Student's t-test). Using 3-way ANOVA analyses of time in chamber data (using genotype, chamber, and sex as major factors), we found chamber to be the only significant ( $P < .0001$ ) major factor for each assay. No significant interactions between factors were measured in the social approach (**A.**) and social novelty assays (**B.**).

### Social Approach (16-24 week-old mice)

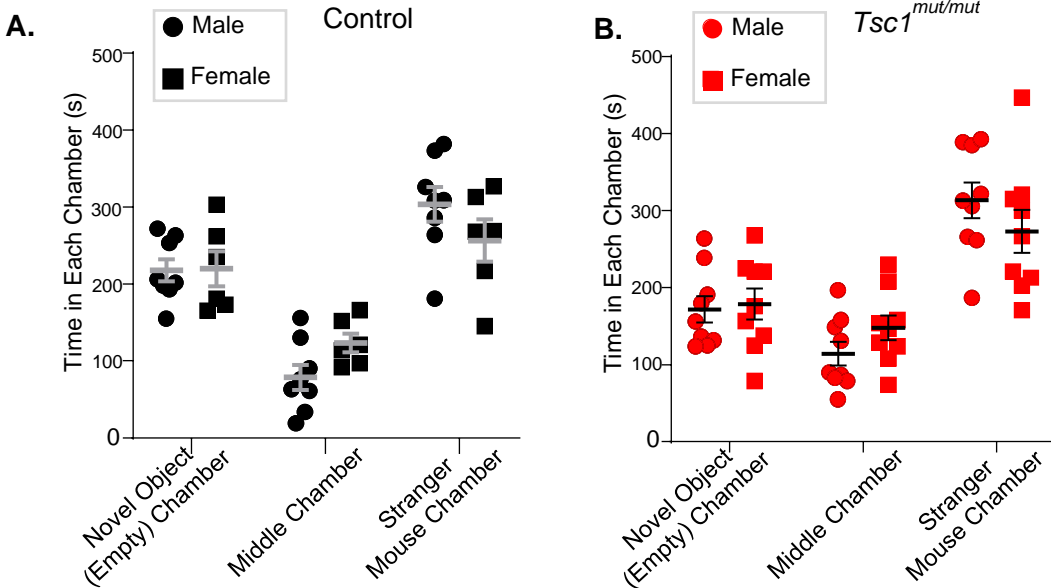

### Social Novelty (16-24 week-old mice)

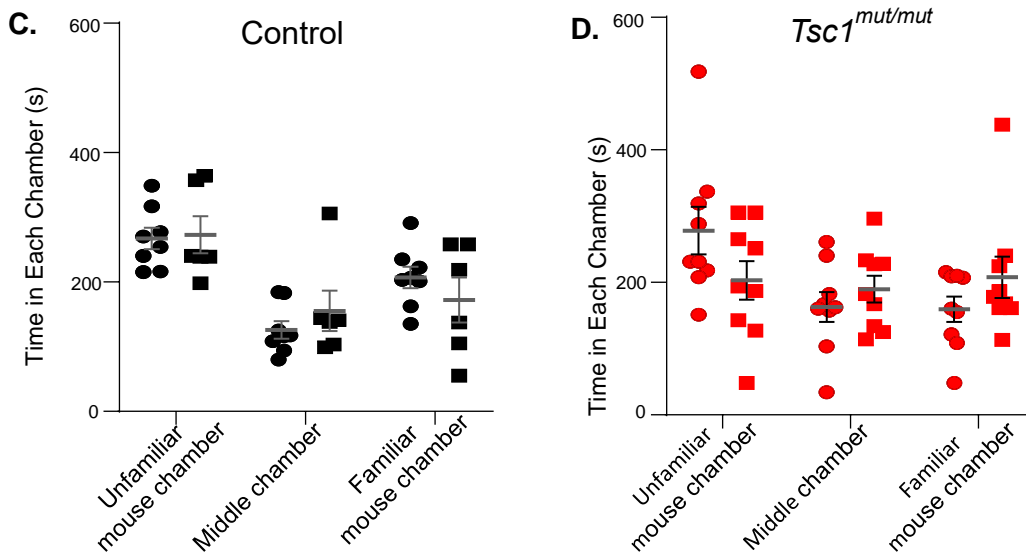

### **Supplemental Figure 5.**

16-24 week-old control (*black*) and  $Tsc1^{mut/mut}$  (*red*) mice performed the 3-chamber social approach and social novelty assays (presented in Figures 5 and 6, respectively). The time spent in each chamber during the 10-minute social approach assay (**A. B.**) and the 10-minute social novelty assay (**C. D.**) are plotted for each genotype. Mean  $\pm$  SEM values are plotted as grey bars. Within each genotype, there were no significant differences between male and female animals for the time spent in each chamber during social approach or social novelty testing (Student's unpaired t-test). A 3-way ANOVA was used to assess these data across genotypes, using genotype, chamber, and sex as major factors. For social approach, this analysis revealed Chamber to be the only significant ( $P < .0001$ ) major factor. A significant ( $P = .023$ ) interaction was also identified between Chamber and Genotype factors. For social novelty (**C. D.**), three-way ANOVA analysis revealed Chamber to be the only significant ( $P < .0001$ ) major factor with no significant interactions.
